# Supplementary material for: Phenotypic characterisation of the cellular immune infiltrate in placentas of cattle following experimental inoculation with Neospora caninum in late gestation
Source: PubMed Central journal article supplement (PMC3726360; doi:10.1186/1297-9716-44-60), 2013-07-22

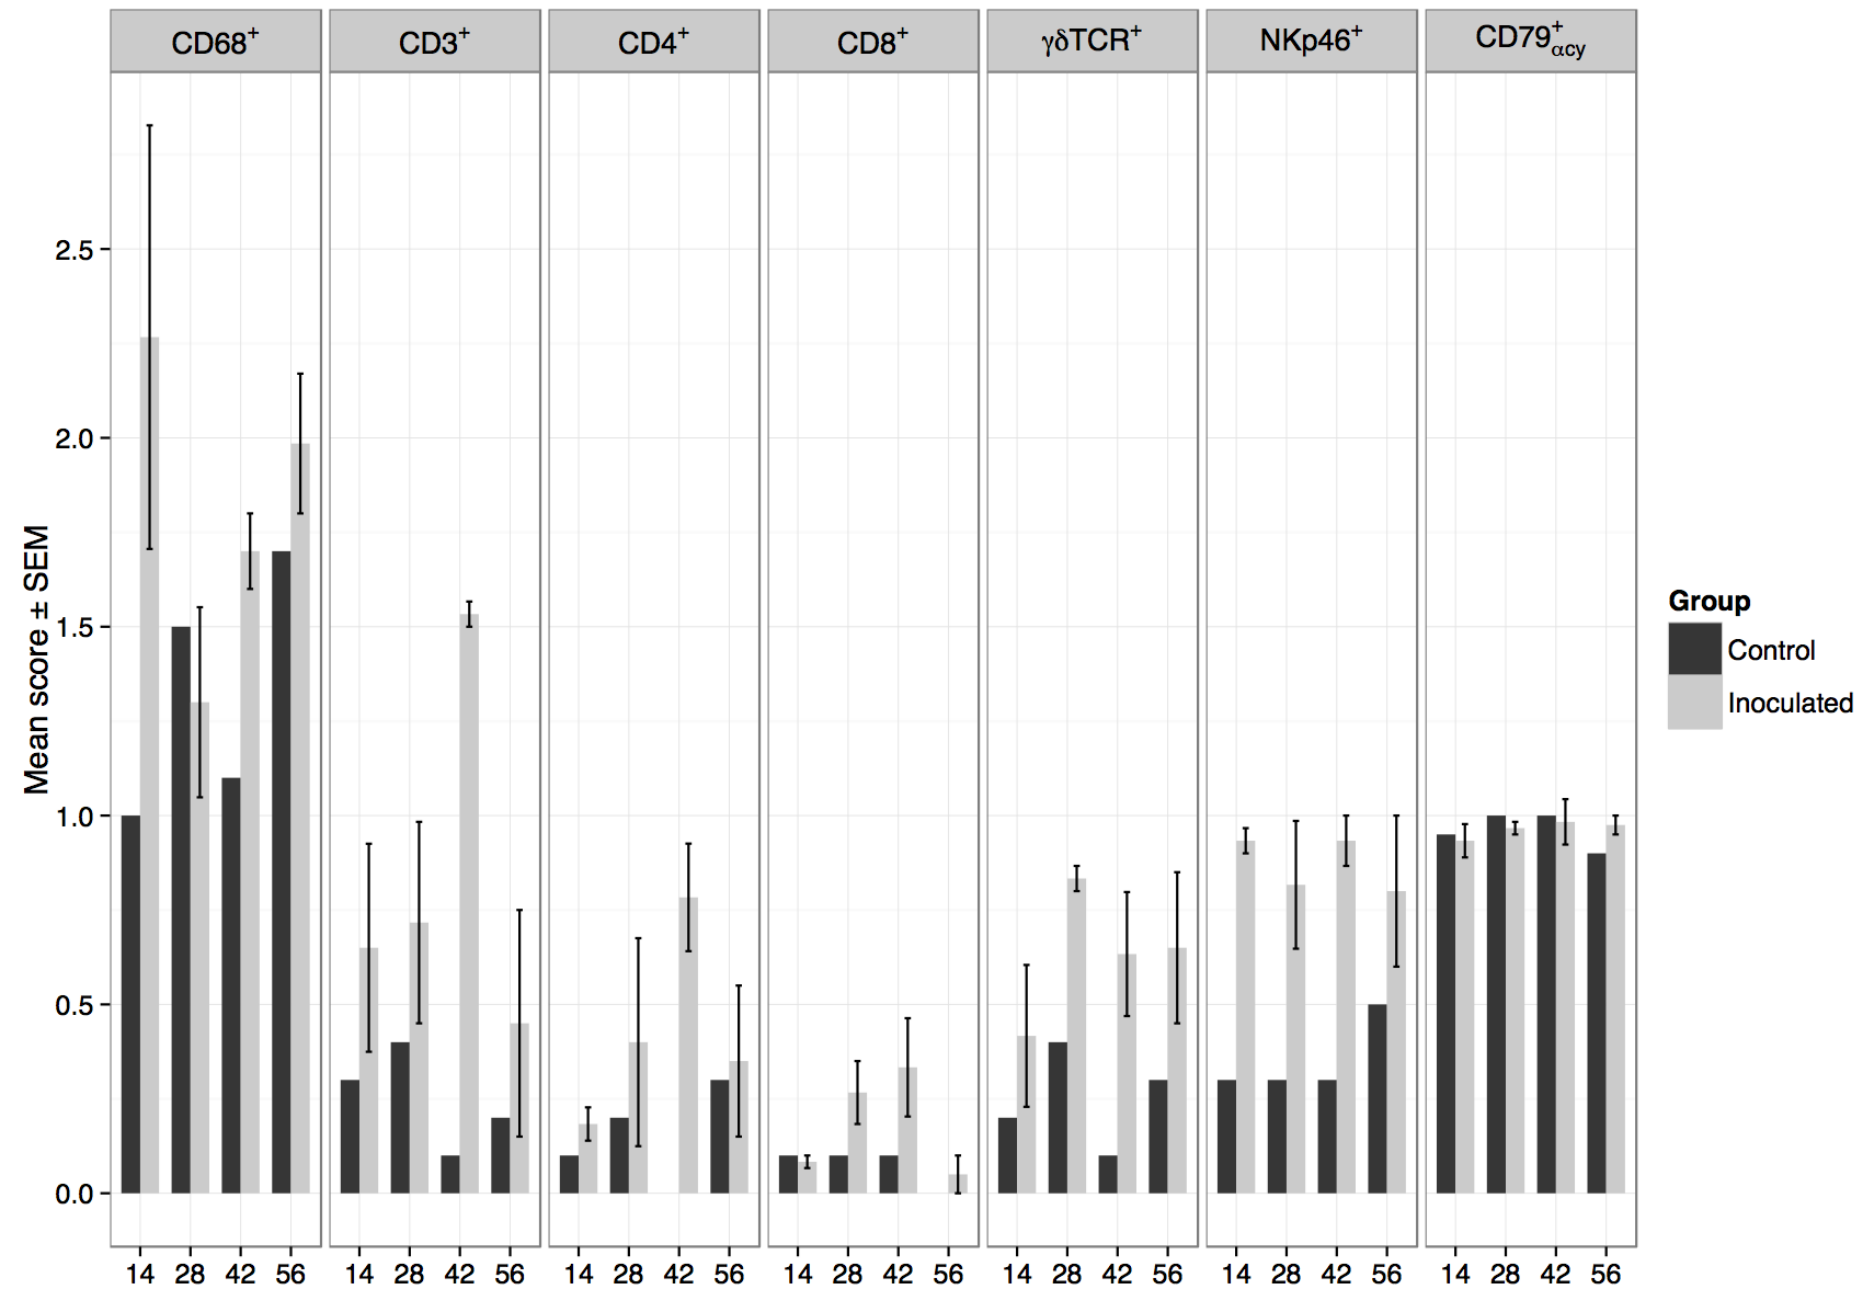

Supplement: 1297-9716-44-60-S2.pdf [file 1297-9716-44-60-S2.pdf]
